# Supplementary material for: Structural, electronic and optical properties of BaRE6(Ge2O7)2(Ge3O10) (RE = Tm, Yb, Lu) compounds and BaYb6(Ge2O7)2(Ge3O10):Tm3+ and BaLu6(Ge2O7)2(Ge3O10):Yb3+,Tm3+ phosphors: potential applications in temperature sensing
Source: Royal Society of Chemistry journal article supplement (doi:10.1039/d3dt00269a), 2023-01-01
Supplement: d3dt00269a3.pdf [file d3dt00269a3.pdf]

Electronic Supplementary Information (ESI)

Structural, electronic and optical properties of  
 $\text{BaRE}_6(\text{Ge}_2\text{O}_7)_2(\text{Ge}_3\text{O}_{10})$  ( $RE = \text{Tm}, \text{Yb}, \text{Lu}$ ) compounds and  
 $\text{BaYb}_6(\text{Ge}_2\text{O}_7)_2(\text{Ge}_3\text{O}_{10}):\text{Tm}^{3+}$ ,  $\text{BaLu}_6(\text{Ge}_2\text{O}_7)_2(\text{Ge}_3\text{O}_{10}):\text{Yb}^{3+}, \text{Tm}^{3+}$  phosphors:  
potential applications in temperature sensing

O. A. Lipina,\* L. L. Surat, A. Yu. Chufarov, I. V. Baklanova, A. N. Enyashin,

M. A. Melkozerova, A. P. Tyutyunnik, and V. G. Zubkov

*Institute of Solid State Chemistry, UB RAS, 620990 Ekaterinburg, Russia*

\* Corresponding author. E-Mail: LipinaOlgaA@yandex.ru

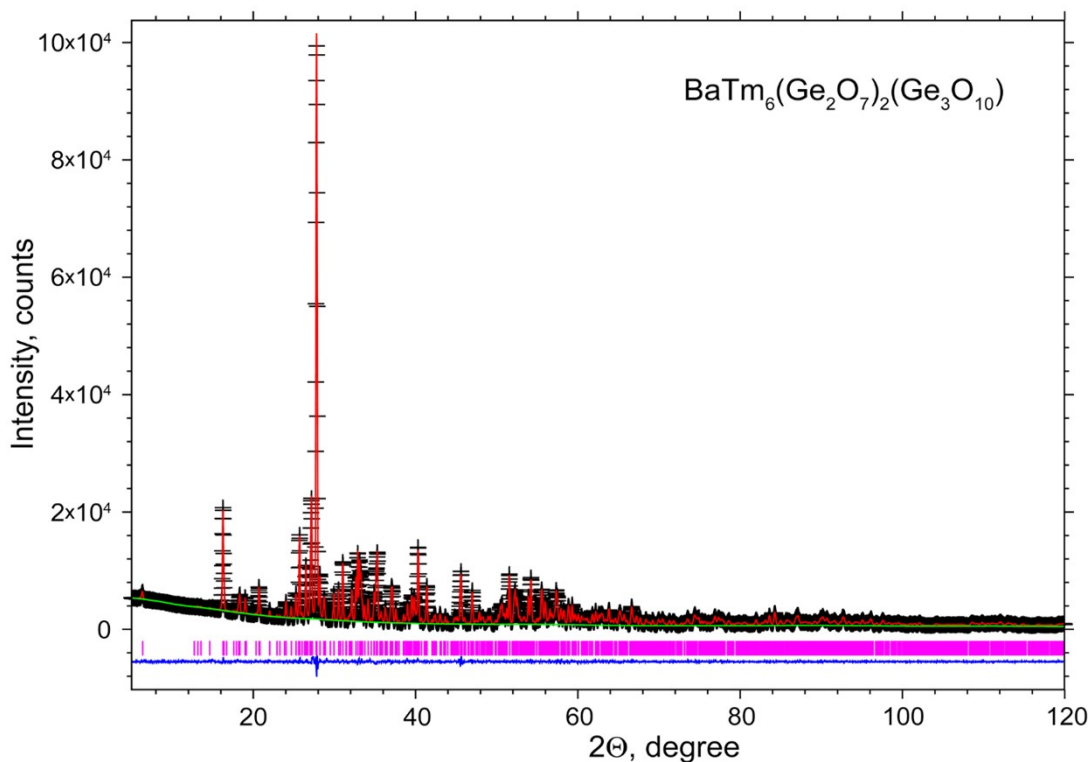

**Fig. S1** Experimental (crosses), calculated (solid line), and difference (bottom line) XRPD patterns for  $\text{BaTm}_6(\text{Ge}_2\text{O}_7)_2(\text{Ge}_3\text{O}_{10})$ . Series of tick marks correspond to the Bragg reflection.

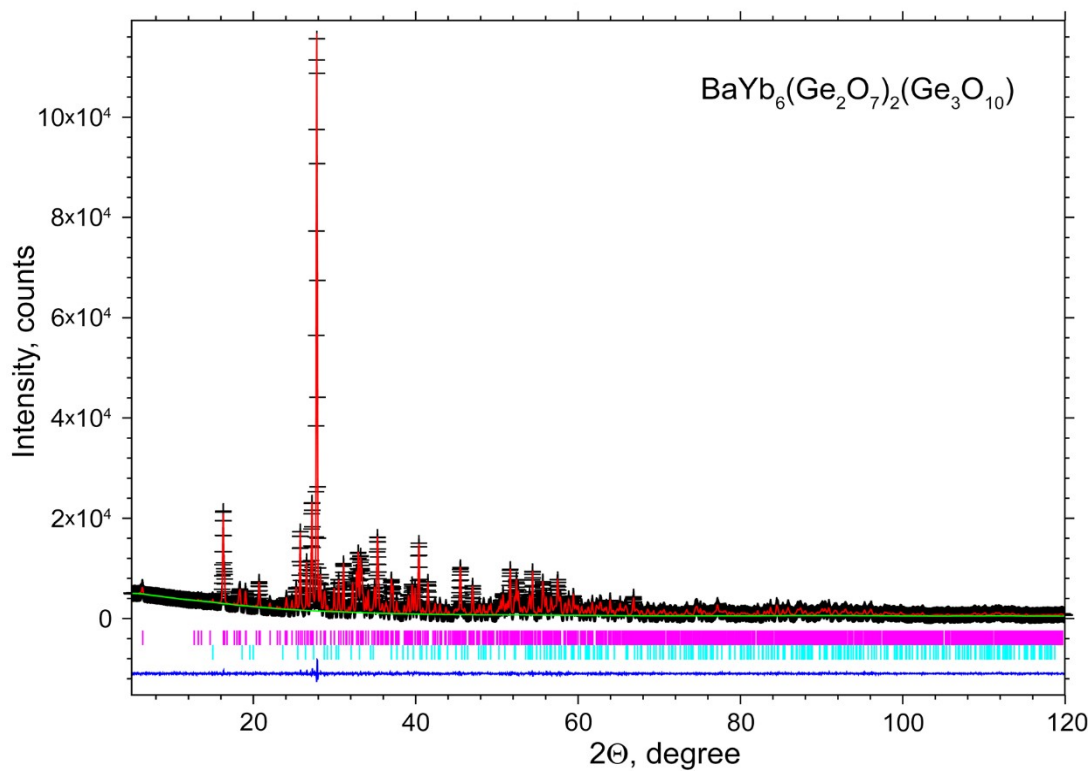

**Fig. S2** Experimental (crosses), calculated (solid line), and difference (bottom line) XRPD patterns for  $\text{BaYb}_6(\text{Ge}_2\text{O}_7)_2(\text{Ge}_3\text{O}_{10})$ . Series of tick marks correspond to the Bragg reflection of the main phase and  $\text{Yb}_2\text{Ge}_2\text{O}_7$  impurity.

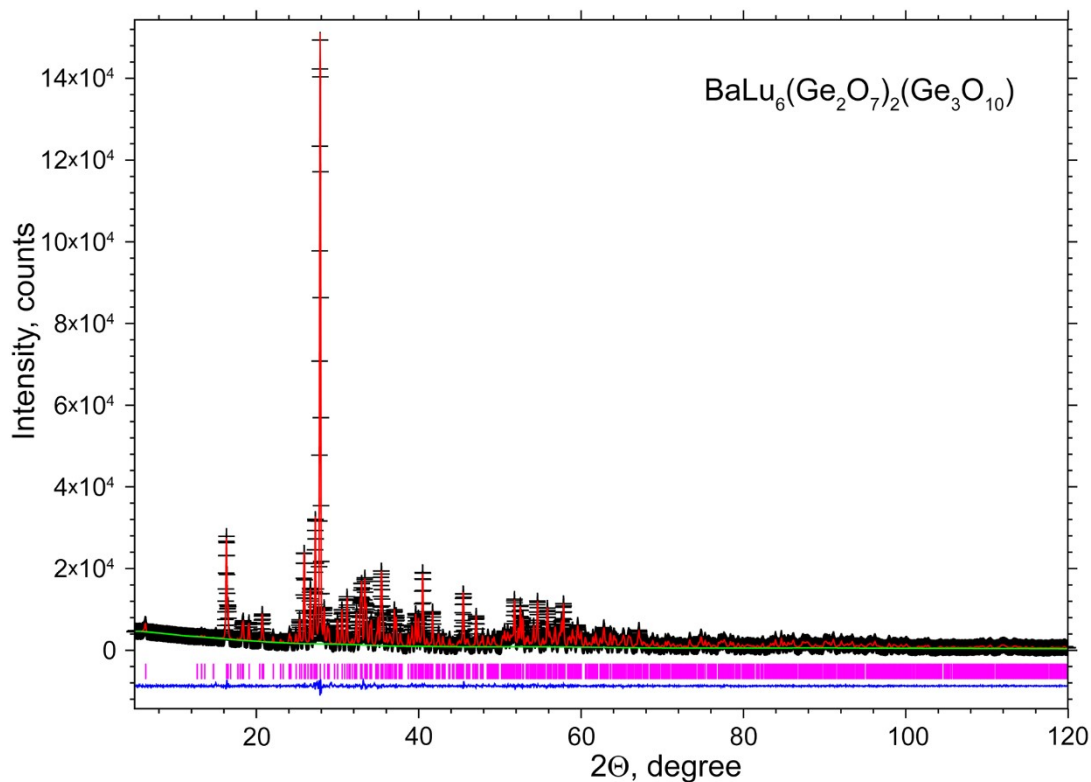

**Fig. S3** Experimental (crosses), calculated (solid line), and difference (bottom line) XRPD patterns for  $\text{BaLu}_6(\text{Ge}_2\text{O}_7)_2(\text{Ge}_3\text{O}_{10})$ . Series of tick marks correspond to the Bragg reflection.

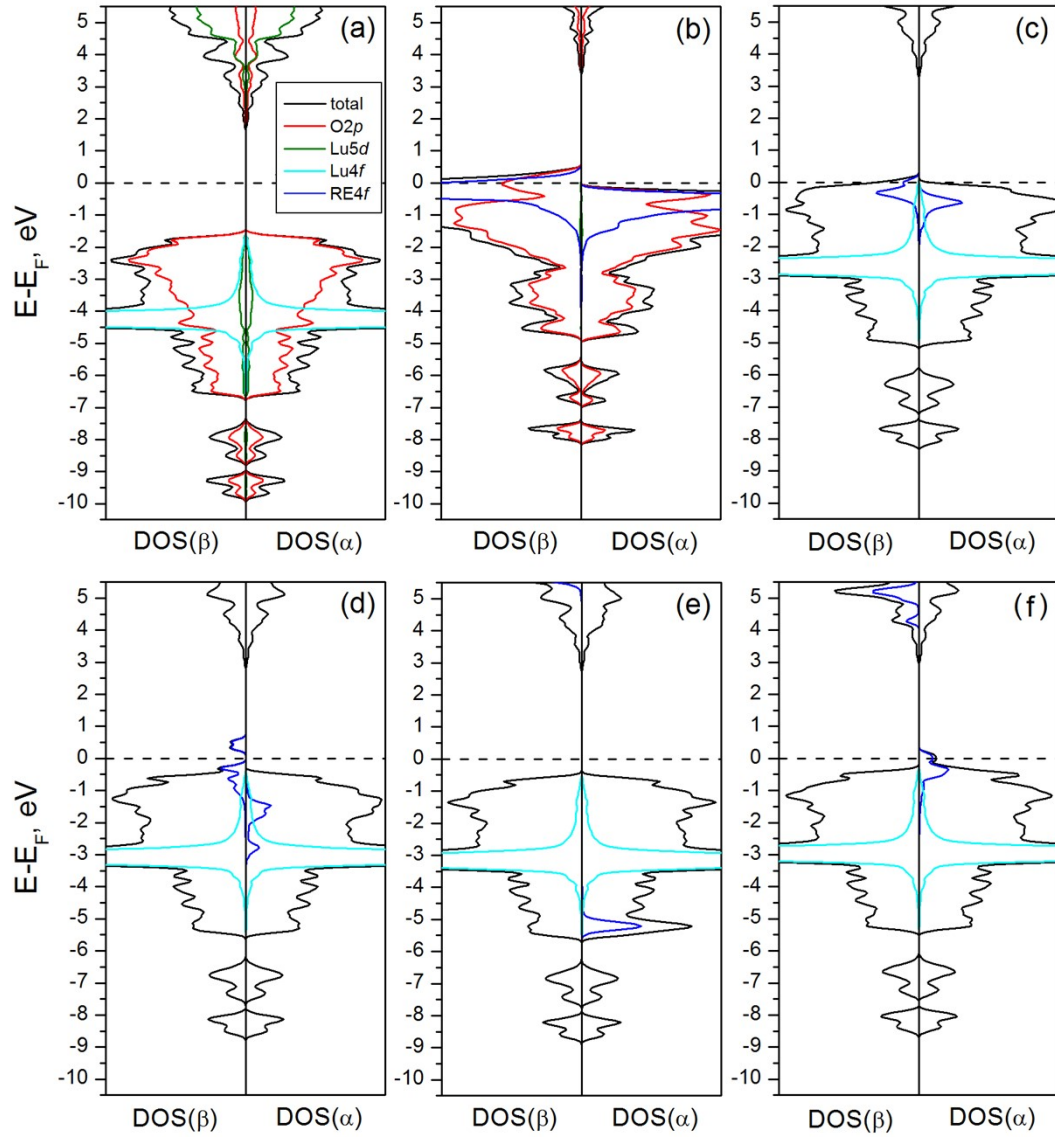

**Fig. S4** Total and partial densities of electronic states for pristine  $\text{BaLu}_6(\text{Ge}_2\text{O}_7)_2(\text{Ge}_3\text{O}_{10})$  (a) and  $\text{BaYb}_6(\text{Ge}_2\text{O}_7)_2(\text{Ge}_3\text{O}_{10})$  compounds (b) as well as for  $\text{BaLu}_6(\text{Ge}_2\text{O}_7)_2(\text{Ge}_3\text{O}_{10})$  matrix doped by single atoms of Yb (c), Tm (d), Gd (e) or Eu (f) in amount of  $\sim 8\%$ . DFT calculations.

**Table S1** Atomic coordinates and isotropic thermal parameters ( $\text{\AA}^2$ ) for  $\text{BaRE}_6(\text{Ge}_2\text{O}_7)_2(\text{Ge}_3\text{O}_{10})$   
( $RE = \text{Tm, Yb, Lu}$ )

| Atom  |    |                             | Tm          | Yb          | Lu          |
|-------|----|-----------------------------|-------------|-------------|-------------|
| Ba    | 2e | x                           | 0.7128(4)   | 0.7107(4)   | 0.7086(4)   |
|       |    | y                           | 0.25        | 0.25        | 0.25        |
|       |    | z                           | 0.07181(31) | 0.07143(27) | 0.06900(32) |
|       |    | $U_{\text{iso}} \times 100$ | 2.63(6)     | 2.56(6)     | 2.85(7)     |
| RE(1) | 4f | x                           | 0.87495(25) | 0.87893(20) | 0.88195(24) |
|       |    | y                           | 0.68508(5)  | 0.68530(4)  | 0.68530(5)  |
|       |    | z                           | 0.25188(20) | 0.25531(16) | 0.25827(19) |
|       |    | $U_{\text{iso}} \times 100$ | 2.32(4)     | 2.253(35)   | 2.38(4)     |
| RE(2) | 4f | x                           | 0.21662(26) | 0.21792(22) | 0.21864(25) |
|       |    | y                           | 0.60063(5)  | 0.60028(4)  | 0.60010(4)  |
|       |    | z                           | 0.60186(21) | 0.60411(18) | 0.60525(19) |
|       |    | $U_{\text{iso}} \times 100$ | 2.33(4)     | 2.521(36)   | 2.53(4)     |
| RE(3) | 4f | x                           | 0.80857(26) | 0.81133(21) | 0.81145(23) |
|       |    | y                           | 0.54061(6)  | 0.54110(5)  | 0.54158(5)  |
|       |    | z                           | 0.82162(19) | 0.82371(16) | 0.82399(19) |
|       |    | $U_{\text{iso}} \times 100$ | 2.44(4)     | 2.234(34)   | 2.40(4)     |
| Ge(1) | 4f | x                           | 0.2723(6)   | 0.2710(5)   | 0.2704(6)   |
|       |    | y                           | 0.47539(12) | 0.47580(10) | 0.47531(11) |
|       |    | z                           | 0.6936(4)   | 0.69227(33) | 0.6908(4)   |
|       |    | $U_{\text{iso}} \times 100$ | 2.51(9)     | 2.67(8)     | 2.25(9)     |
| Ge(2) | 4f | x                           | 0.3117(5)   | 0.3130(4)   | 0.3133(5)   |
|       |    | y                           | 0.61248(11) | 0.61319(9)  | 0.61316(11) |
|       |    | z                           | 0.1200(4)   | 0.12314(35) | 0.1238(4)   |
|       |    | $U_{\text{iso}} \times 100$ | 2.91(9)     | 2.67(7)     | 2.72(9)     |
| Ge(3) | 4f | x                           | 0.7602(5)   | 0.7601(4)   | 0.7647(5)   |
|       |    | y                           | 0.66542(11) | 0.66583(9)  | 0.66510(11) |
|       |    | z                           | 0.7346(4)   | 0.73836(34) | 0.7403(4)   |
|       |    | $U_{\text{iso}} \times 100$ | 2.59(9)     | 2.26(7)     | 2.20(8)     |
| Ge(4) | 2e | x                           | 0.5532(8)   | 0.5468(6)   | 0.5436(7)   |
|       |    | y                           | 0.25        | 0.25        | 0.25        |
|       |    | z                           | 0.5447(5)   | 0.54185(48) | 0.5415(5)   |
|       |    | $U_{\text{iso}} \times 100$ | 2.87(12)    | 2.98(11)    | 2.64(13)    |
| O(1)  | 4f | x                           | 0.1031(23)  | 0.1039(20)  | 0.0938(23)  |
|       |    | y                           | 0.4481(5)   | 0.4507(5)   | 0.4499(5)   |
|       |    | z                           | 0.4605(18)  | 0.4666(15)  | 0.4635(17)  |
| O(2)  | 4f | x                           | 0.4100(24)  | 0.4159(21)  | 0.4118(24)  |
|       |    | y                           | 0.5293(5)   | 0.5299(4)   | 0.5278(5)   |
|       |    | z                           | 0.6733(18)  | 0.6696(15)  | 0.6773(18)  |
| O(3)  | 4f | x                           | 0.5299(23)  | 0.5307(20)  | 0.5339(23)  |
|       |    | y                           | 0.4429(4)   | 0.4408(4)   | 0.4425(5)   |
|       |    | z                           | 0.7969(18)  | 0.8030(16)  | 0.7974(18)  |
| O(4)  | 4f | x                           | 0.0933(22)  | 0.0917(19)  | 0.0894(22)  |
|       |    | y                           | 0.4819(5)   | 0.4795(4)   | 0.4798(5)   |
|       |    | z                           | 0.8548(19)  | 0.8535(17)  | 0.8505(19)  |
| O(5)  | 4f | x                           | 0.4837(25)  | 0.4889(21)  | 0.4923(24)  |
|       |    | y                           | 0.6600(5)   | 0.6618(4)   | 0.6614(5)   |
|       |    | z                           | 0.1112(17)  | 0.1126(16)  | 0.1161(19)  |
| O(6)  | 4f | x                           | 0.1214(24)  | 0.1195(21)  | 0.1168(24)  |
|       |    | y                           | 0.5957(5)   | 0.5974(4)   | 0.5973(5)   |
|       |    | z                           | -0.1116(19) | -0.1173(16) | -0.1090(18) |
| O(7)  | 4f | x                           | 0.1415(22)  | 0.1402(19)  | 0.1581(21)  |
|       |    | y                           | 0.6248(5)   | 0.6237(4)   | 0.6265(5)   |

|       |    |                                    |            |            |            |
|-------|----|------------------------------------|------------|------------|------------|
|       |    | z                                  | 0.2935(18) | 0.2985(16) | 0.3101(18) |
| O(8)  | 4f | x                                  | 0.9144(21) | 0.9117(18) | 0.9122(21) |
|       |    | y                                  | 0.6949(5)  | 0.6941(4)  | 0.6959(5)  |
|       |    | z                                  | 0.9491(17) | 0.9486(15) | 0.9482(17) |
| O(9)  | 4f | x                                  | 0.6170(23) | 0.6249(21) | 0.6242(24) |
|       |    | y                                  | 0.6120(4)  | 0.6126(4)  | 0.6129(5)  |
|       |    | z                                  | 0.7530(17) | 0.7554(15) | 0.7603(18) |
| O(10) | 4f | x                                  | 0.9408(25) | 0.9504(21) | 0.9504(23) |
|       |    | y                                  | 0.6655(5)  | 0.6648(4)  | 0.6638(5)  |
|       |    | z                                  | 0.5646(18) | 0.5712(15) | 0.5713(17) |
| O(11) | 4f | x                                  | 0.4722(23) | 0.4800(20) | 0.4896(23) |
|       |    | y                                  | 0.7012(5)  | 0.7006(4)  | 0.7008(5)  |
|       |    | z                                  | 0.6210(16) | 0.6262(14) | 0.6271(16) |
| O(12) | 2e | x                                  | 0.3351(29) | 0.3399(25) | 0.3283(27) |
|       |    | y                                  | 0.25       | 0.25       | 0.25       |
|       |    | z                                  | 0.6876(24) | 0.6844(21) | 0.6871(24) |
| O(13) | 2e | x                                  | 0.8621(34) | 0.8605(28) | 0.8520(32) |
|       |    | y                                  | 0.25       | 0.25       | 0.25       |
|       |    | z                                  | 0.6910(26) | 0.6968(22) | 0.6988(25) |
|       |    | U <sub>iso</sub> ×100 <sup>a</sup> | 1.71(9)    | 2.07(9)    | 1.61(10)   |

<sup>a</sup> The thermal vibration parameters of oxygen atoms have been constrained as a single variable

**Table S2** The bond valence sums (BVS) for the cations and oxygen anions, and global instability indexes (*GII*) for BaRE<sub>6</sub>(Ge<sub>2</sub>O<sub>7</sub>)<sub>2</sub>(Ge<sub>3</sub>O<sub>10</sub>) (*RE* = Tm, Yb, Lu)

| Atom       | Assumed oxidation state | Tm    |        | Yb    |        | Lu    |        |
|------------|-------------------------|-------|--------|-------|--------|-------|--------|
|            |                         | BVS   | % dev. | BVS   | % dev. | BVS   | % dev. |
| Ba         | +2                      | 1.780 | 10     | 1.792 | 10     | 1.861 | 7      |
| RE(1)      | +3                      | 3.146 | 5      | 2.990 | 0      | 2.937 | 2      |
| RE(2)      | +3                      | 3.155 | 5      | 3.154 | 5      | 3.060 | 2      |
| RE(3)      | +3                      | 3.102 | 3      | 2.941 | 2      | 2.840 | 5      |
| Ge(1)      | +4                      | 4.161 | 4      | 4.131 | 3      | 4.347 | 9      |
| Ge(2)      | +4                      | 4.108 | 3      | 3.968 | 1      | 3.984 | 0      |
| Ge(3)      | +4                      | 3.810 | 5      | 4.086 | 2      | 4.125 | 3      |
| Ge(4)      | +4                      | 3.761 | 6      | 3.724 | 7      | 3.689 | 8      |
| O(1)       | -2                      | 2.013 | 1      | 2.041 | 2      | 2.025 | 1      |
| O(2)       | -2                      | 2.151 | 8      | 2.070 | 3      | 2.154 | 8      |
| O(3)       | -2                      | 2.044 | 2      | 2.008 | 0      | 2.002 | 0      |
| O(4)       | -2                      | 2.051 | 3      | 2.015 | 1      | 1.975 | 1      |
| O(5)       | -2                      | 1.985 | 1      | 1.882 | 6      | 1.883 | 6      |
| O(6)       | -2                      | 2.029 | 1      | 1.957 | 2      | 1.983 | 1      |
| O(7)       | -2                      | 2.067 | 3      | 2.036 | 2      | 2.061 | 3      |
| O(8)       | -2                      | 2.027 | 1      | 2.107 | 5      | 2.055 | 3      |
| O(9)       | -2                      | 2.139 | 7      | 2.154 | 8      | 2.162 | 8      |
| O(10)      | -2                      | 1.926 | 4      | 1.838 | 8      | 1.879 | 6      |
| O(11)      | -2                      | 1.800 | 10     | 1.904 | 5      | 1.892 | 5      |
| O(12)      | -2                      | 2.038 | 2      | 2.102 | 5      | 2.044 | 2      |
| O(13)      | -2                      | 2.003 | 0      | 1.930 | 4      | 1.950 | 3      |
| <i>GII</i> |                         | 0.13  |        | 0.12  |        | 0.14  |        |

**Table S3** IR and Raman wavenumbers (cm<sup>-1</sup>) for BaRE<sub>6</sub>(Ge<sub>2</sub>O<sub>7</sub>)<sub>2</sub>(Ge<sub>3</sub>O<sub>10</sub>), RE = Tm, Yb, Lu.

| Tm  |       | Yb  |       | Lu  |       | Assignment                   |
|-----|-------|-----|-------|-----|-------|------------------------------|
| IR  | Raman | IR  | Raman | IR  | Raman |                              |
| 946 |       | 956 |       | 963 |       | $\nu_{as}(\text{Ge-O-Ge})$   |
| 853 | 860   | 854 | 863   | 856 | 860   | $\nu_s(\text{Ge-O})$         |
|     | 834   |     | 835   |     | 832   |                              |
| 805 | 799   | 806 | 799   | 809 | 795   | $\nu_{as}(\text{Ge-O})$      |
| 752 | 768   | 752 | 772   | 755 | 769   |                              |
| 734 |       | 727 |       | 732 |       |                              |
| 548 |       | 549 |       | 551 |       | $\nu_s(\text{Ge-O-Ge})$      |
| 504 | 503   | 504 | 505   | 506 | 501   |                              |
| 463 |       | 469 |       | 468 |       | $\delta_{as}(\text{O-Ge-O})$ |
| 438 | 436   | 441 | 438   | 440 | 435   |                              |
| 394 | 409   | 395 | 408   | 397 | 407   | $\delta_s(\text{O-Ge-O})$    |
|     | 368   |     | 367   |     | 365   | $\rho_r(\text{O-Ge-O})$      |
|     | 346   |     | 345   |     | 344   |                              |
|     | 307   |     | 305   |     | 305   |                              |
